1 Mismatch repair hierarchy of *Pseudomonas putida* revealed by  
2 mutagenic ssDNA recombineering of the *pyrF* gene

3  
4 by

5  
6 Tomas Aparicio<sup>1</sup>, Akos Nyerges<sup>2</sup>, István Nagy<sup>3,4</sup>, Csaba Pal<sup>2</sup>,  
7 Esteban Martínez-García\*<sup>1</sup> and Víctor de Lorenzo<sup>1\*</sup>

8  
9 <sup>1</sup>Systems and Synthetic Biology Program, Centro Nacional de Biotecnología (CNB-CSIC), Campus de  
10 Cantoblanco, Madrid 28049, Spain <sup>2</sup>Synthetic and Systems Biology Unit, Institute of Biochemistry and  
11 <sup>3</sup>Sequencing Platform, Biological Research Centre, Hungarian Academy of Sciences, H-6726 Szeged,  
12 <sup>4</sup>Sequencing Laboratory, SeqOmics Biotechnology Ltd., 6782 Mórahalom, Hungary

13  
14 **Running title:** The MMR system of *Pseudomonas putida*

15 **Keywords:** *Pseudomonas*, recombineering, mutagenesis, *mutS*, *mutL*, mismatch repair

16  
17  
18 **Originality-Significance Statement.** Single-stranded DNA (ssDNA) recombineering has emerged in  
19 recent years as one of the most powerful technologies of genome editing in *E. coli* and other  
20 Enterobacteria. However, the efforts to expand the concept and the methods towards environmental  
21 microorganisms such as *Pseudomonas putida* have been limited thus far by several gaps in our  
22 fundamental knowledge of how nucleotide mismatch repair (MMR) operates in such non-model species.  
23 One critical bottleneck is the hierarchy of recognition of different types of base mispairings as well as the  
24 need of setting up strategies for counteracting MMR and thus enabling tolerance to all types of changes.  
25 The work presented here tackles both issues and makes *P. putida* amenable to sophisticated genetic  
26 manipulations that were impossible before.

27  
28  
29 \* Correspondence to: Víctor de Lorenzo and Esteban Martínez-García, Centro Nacional de  
30 Biotecnología-CSIC, Campus de Cantoblanco, Madrid 28049, Spain. Tel: 34- 91 585 45 36; Fax: 34-91  
31 585 45 06. E-mails: [vdlorenzo@cnb.csic.es](mailto:vdlorenzo@cnb.csic.es), [emartinez@cnb.csic.es](mailto:emartinez@cnb.csic.es)  
32

1 SUMMARY

2

3 The mismatch repair (MMR) system is one of the key molecular devices that prokaryotic cells have for  
4 ensuring fidelity of DNA replication. While the canonical MMR of *E. coli* involves 3 proteins (encoded by  
5 *mutS*, *mutL* and *mutH*), the soil bacterium *Pseudomonads putida* has only 2 *bona fide* homologues  
6 (*mutS* and *mutL*) and the sensitivity of this abridged system to different types of mismatches is  
7 unknown. On this background, sensitivity to MMR of this bacterium was inspected through single  
8 stranded (ss) DNA recombineering of the *pyrF* gene (the prokaryotic equivalent to yeast's URA3) with  
9 mutagenic oligos representative of every possible mispairing under either wild-type conditions,  
10 permanent deletion of *mutS* or transient loss of *mutL* activity (brought about by the thermoinducible  
11 dominant negative allele *mutLE36K*). Analysis of single nucleotide mutations borne by clones resistant  
12 to fluoroarotic acid (5FOA, the target of wild type PyrF) pinpointed prohibited and tolerated single-  
13 nucleotide replacements and exposed a clear grading of mismatch recognition. The resulting data  
14 unequivocally established the hierarchy A:G< C:C< G:A< C:A, A:A, G:G, T:T, T:G, A:C, C:T< G:T, T:C  
15 as the one prevalent in *Pseudomonas putida*. This information was vital for enabling recombineering  
16 strategies aimed at single-nucleotide changes in this biotechnologically important species.

17

18

19 INTRODUCTION

20

21 Mutations in DNA are often caused by small insertion-deletion loops generated by strand slippage  
22 during replication and/or misincorporation of bases—by themselves or damaged by oxidative stress or  
23 other modifications (Wyrzykowski and Volkert, 2003; Putnam, 2016). The resulting base pairing  
24 mismatches are most frequently fixed by mechanisms that are remarkably conserved through the  
25 prokaryotic realm (Putnam, 2016). The steps involved in such a repair involve the recognition of an  
26 unusual structure in the DNA helix caused by the mismatch, excision of the last-synthesized strand to  
27 the site of mispairing and *de novo* synthesis of the earlier excised strand. In order to avoid inheritance of  
28 mutations, the critical feature of mismatch repair (MMR) systems is distinguishing between the old, non-  
29 modified DNA strand that acts as template and the new DNA sequence bearing the lesion. In the case  
30 where the issue has been examined in more depth (*Escherichia coli*), such a discrimination seems to be  
31 feasible owing to the interplay between its MMR and the *dam* methylation system for d(GATC) sites.

1 According to the current model, the MMR machinery is recruited towards the strand that is transiently  
2 unmethylated after replication. This intricate process is effected through the concerted action of three  
3 proteins encoded by *mutS* (mismatch recognition), *mutL* (signal propagation) and *mutH* (strand  
4 discrimination), the action of which is then followed by DNA excision and resynthesis involving additional  
5 proteins UvrD and MutU (Matson and Robertson, 2006).

6  
7 Inspection of homologous genes in a variety of bacterial branches suggests many species-specific  
8 adaptations around the archetypal MMR of *E. coli*. MutS and MutL variants have been found in virtually  
9 all Gammaproteobacteria, but MutH is often missing in many other members of the group (Putnam,  
10 2016). This raises questions on whether the same deformations of the DNA helix are recognized by the  
11 MMR systems (mostly by MutS) in all species and how DNA strand discrimination occurs in bacteria  
12 lacking *mutH*. This question has a direct consequence on the hierarchy of mismatch recognition, as  
13 each of the 12 possible mispairings (A:G, C:C, G:A, C:A, A:A, G:G, T:T, T:G, A:C, C:T, G:T and T:C)  
14 should generate a distinct type of distortion in the DNA structure. Intuitively, the mechanism just  
15 described would predict that the bulkier the mismatch is, the easier it is to detect by the MMR system  
16 and thus fixed. But it is also possible that MutS specializes in different mispairings in diverse species. As  
17 a consequence, the MMR may become blind to some nucleotide changes, which could thus be  
18 propagated into the progeny in some hosts while others would be instead quickly removed. This  
19 originates a hierarchy of mismatch recognition by MMR, which has been clearly established in *E. coli*  
20 and other enterobacteria (Kramer *et al.*, 1984; Babic *et al.*, 1996; Joshi and Rao, 2001; Nyerges *et al.*,  
21 2016) but it less known in most others (Long *et al.*, 2014; Long *et al.*, 2018). Data on such recognition  
22 order is of essence for planning recombineering experiments aimed at introducing single nucleotide  
23 changes at specific genomic sites, as they can be counteracted with various efficiencies by the native  
24 MMR system of the target species and strains (Wang *et al.*, 2009; Aparicio *et al.*, 2016; Nyerges *et al.*,  
25 2016).

26  
27 As is the case with other *Pseudomonas*, *P. putida* strain KT2440 has *mutS* and *mutL*, but lacks both  
28 *mutH* and a *dam* methylation system. Unlike *E. coli*, strand discrimination in this species could occur not  
29 through methylation but possibly through a device somehow embedded in the replication machinery  
30 itself, but the state of affairs in *Pseudomonas* is uncertain at this time (Oliver *et al.*, 2002; Saumaa *et al.*,  
31 2006; Tark *et al.*, 2008). In view of the growing importance of *P. putida* as a platform for synthetic

1 biology-guided metabolic engineering and the benefits of implementing high efficiency genome editing  
2 methods (i.e. MAGE; Wang, 2009 #62} and DIvERGE (Nyerges *et al.*, 2018)), it became of essence to  
3 set unequivocally the recognition preference of its native MMR system for each of the possible single  
4 nucleotide mispairs.

5

6 In the work below presented below we have capitalized on the availability of a *P. putida*-born, Erf-like  
7 recombinase (called Rec2) and a simple single-stranded (ss) DNA recombineering protocol (Ricaurte *et*  
8 *al.*, 2018) for exploring the whole recognition landscape of mismatches that can be introduced in the  
9 genomic DNA of strain EM42 of this species (Martinez-Garcia *et al.*, 2014). By inspecting the distribution  
10 of single-nucleotide changes covering the whole spectrum of mispairs we authenticated the ease of  
11 replacement of given bases by any of the others in MMR-plus and MMR-minus genetic backgrounds.  
12 The outcome turned out to be similar, but not identical, to what is known for *E. coli*. The robust  
13 recombineering approach for inspecting the MMR adopted in this work has been instrumental for setting  
14 a much improved method that can be of general value for unraveling the same question—and  
15 expanding recombineering in general— to many other bacterial species.

16

## 17 RESULTS AND DISCUSSION

18

### 19 *A genetic platform for inspecting MMR in P. putida*

20

21 The starting point of this work is the notion that inhibiting MMR should result in the bias-free  
22 incorporation of all possible base substitutions in the DNA helix *in vivo* (Nyerges, 2016). Such an  
23 inhibition could be made permanent e.g. through deletion of *mutS*, or transient e.g. through conditional  
24 expression of a dominant negative allele of either *mutS* (Wu and Marinus, 1994) or *mutL* (Aronshtam  
25 and Marinus, 1996; Nyerges *et al.*, 2016). While deleting *mutS* is straightforward with genetic methods  
26 available for *P. putida* (see *Experimental procedures*), the second scenario (temporary suppression of  
27 MMR genes) required a different strategy. Inspection of the *mutL* (PP\_4896) of *P. putida* indicated a 44  
28 % aa identity with the orthologue of *E. coli*, which was more pronounced in their N-terminal half of the  
29 corresponding proteins—where the segments important for their function lay (Ban and Yang, 1998;  
30 Putnam, 2016). A E32K change in such an N-terminal of *E. coli*'s MutL is known to generate a mutated,  
31 inactive protein that, when over expressed from a plasmid, behaves as a negative dominant allele

1 capable of impairing the activity of the MMR machinery of *E. coli* in the presence of the chromosomal,  
2 wild-type copy (Aronshtam and Marinus, 1996; Nyerges *et al.*, 2016). This location is equivalent to  
3 conserved amino acid position 36 of the *P. putida*'s homologue (Fig. 1, Supplementary Fig. S1) and  
4 therefore we reasoned that overexpression *in vivo* of the variant *mutL*<sub>E36K</sub><sup>PP</sup> could bring about the same  
5 effect in this species. Finally, in order to enter mismatches of different types in a target DNA sequence,  
6 we thought of exploiting the ability of the Rec2 recombinase to enable the invasion of the replication fork  
7 of *P. putida* by synthetic single-stranded (ss) oligonucleotides *in vivo* (Ricaurte *et al.*, 2018).

8  
9 On these bases, we generated, in one hand, an MMR-null strain by erasing *mutS* altogether (Table 1),  
10 which was used as a reference for complete elimination of mismatch repair. *P. putida* EM42  $\Delta$ *mutS* was  
11 constructed by deleting a 0.7 Kb region of the gene PP\_1626 by ssDNA recombineering/CRISPR-Cas9  
12 (see details in *Experimental Procedures*). The phenotype of this strain was tested with a rifampicin  
13 resistance (Rif<sup>R</sup>) assay, which was performed as a proxy of the mutational state of caused by the  
14 deletion. Results shown in Supplementary Fig. S2A accredited that—as expected—the deleted mutant  
15 underwent a much higher spontaneous mutational regime than its parental strain, which can be  
16 attributed to the loss of MMR system.

17  
18 On the other hand, we constructed two conditional expression plasmids for either *rec2* alone or the  
19 same but assembled in the same transcriptional unit together with *mutL*<sub>E36K</sub><sup>PP</sup>. In either case, the  
20 expression cargo (whether *rec2* alone or *rec2-mutL*<sub>E36K</sub><sup>PP</sup>) was placed under the control of the heat-  
21 inducible cl857-PL system of vector pSEVA2514 (Aparicio *et al.*, 2019b), which allows intense by short-  
22 lasting induction of the genes inserted downstream. The result of these operations were plasmids  
23 pSEVA2514-*rec2* (GenBank N° MN180223) and pSEVA2514-*rec2-mutL*<sub>E36K</sub><sup>PP</sup> (GenBank N° MN180222;  
24 Fig. 1). Supplementary Fig. S2B shows that this expression system overperformed the previous  
25 recombineering platform based on induction of the recombinase with 3-methyl-benzoate (3-MB) through  
26 the *xyIS-Pm* device (Ricaurte *et al.*, 2018), with an order of magnitude of improvement in editing  
27 efficiency. Simultaneous expression of the recombinase and *mutL*<sub>E36K</sub><sup>PP</sup> with this system should  
28 therefore enable the survival of mismatches generated by recombineering within a given time window,  
29 which would otherwise be removed by an active MMR system (see below). In order to optimize the  
30 recombineering protocol, different induction times for the thermal induction of *rec2* were tested

1 (Supplementary Fig. S2C), as little as 5 min being sufficient for achieving high levels of allelic  
2 replacements in the standard recombineering assay described by (Ricaurte *et al.*, 2018).

3

#### 4 *Benchmarking the MMR activity of wild-type and mutS/mutL<sub>E36K</sub><sup>PP</sup> P. putida strains*

5

6 In order to obtain some reference values on the ability of MutL<sub>E36K</sub><sup>PP</sup> to allow inheritance of mismatches  
7 in *P. putida*, we designed two recombineering oligonucleotides (SR and NR, Fig. 2A, Table 1). These  
8 enter single-nucleotide changes that—using the *E. coli* system as an orientation—represent the  
9 extremes of the ability of the MMR system to remove mismatches. But at the same time they cause  
10 easily detectable phenotypes if incorporated in the replication fork. In one case (SR oligonucleotide;  
11 (Ricaurte *et al.*, 2018)) the sequence was designed for targeting the *rpsL* gene (PP\_0449) of *P. putida*  
12 EM42. This gene encodes the 30S ribosomal protein S12 and a change in the wild-type codon AAA  
13 (K43) → ACA (T43) confers streptomycin resistance (Sm<sup>R</sup>). Upon Rec2-mediated recombineering, SR  
14 should generate an A:G mismatch predicted to show low sensitivity to the MMR system (Babic *et al.*,  
15 1996; Nyerges *et al.*, 2016). If maintained, the change enters in the *rpsL* the mutation A→C conferring  
16 Sm<sup>R</sup>. By the same token, oligonucleotide NR (Table 1) was designed to target the gene *gyrA* (PP\_1767)  
17 of *P. putida*, (encoding a DNA gyrase subunit) for executing an amino acid change D87N known to  
18 confer resistance to nalidixic acid (Nal<sup>R</sup>) in *E. coli* and *P. aeruginosa* (Yoshida *et al.*, 1990; Kureishi *et*  
19 *al.*, 1994). The mismatch introduced by NR causes the same change in the *gyrA* gene of *P. putida*  
20 (GAC) D87 → (AAT) N87 but in this case making two modifications at once (G→A and C→T). Both  
21 G:T and C:A mismatches thus ought to survive the action of MMR to result in resistance to nalidixic acid  
22 (Nal<sup>R</sup>). NR thus had a considerable diagnostic value, as G:T and C:A mismatches are highly sensitive to  
23 the MMR system (using again *E. coli* as provisional reference; (Nyerges *et al.*, 2016).

24

25 For benchmarking the experimental system to investigate the mispairing preferences of the MMR  
26 system of *P. putida*, strain EM42 was separately transformed with pSEVA2514-*rec2* and with  
27 pSEVA2514-*rec2-mutL<sub>E36K</sub><sup>PP</sup>*. Also *P. putida* EM42  $\Delta$ *mutS* was transformed with pSEVA2514-*rec2*. The  
28 resulting transformants were expected to support ssDNA recombineering of the mutagenic  
29 oligonucleotides described above upon thermal activation of the P<sub>L</sub> promoter. However, they are  
30 anticipated to have MMR in a different operational state: *P. putida*  $\Delta$ *mutS* (pSEVA2514-*rec2*) has a  
31 permanently disabled system due to the deletion of the main component of MMR machinery (*mutS*); *P.*

1 *putida* EM42 (pSEVA2514-*rec2*) has a wild-type MMR system; and *P. putida* EM42 (pSEVA2514-*rec2*-  
2 *mutL*<sub>E36K</sub><sup>PP</sup>) as a functional wild-type MMR system at 30 °C which can be transiently inactivated upon  
3 thermal induction and overexpression of the dominant-negative *mutL*<sub>E36K</sub><sup>PP</sup> allele.

4

5 The results of the recombineering experiments run with these 3 strains upon electroporation of the SR  
6 and NR oligonucleotides are shown in Fig. 2B. In one hand, SR incorporation to the replication fork  
7 yielded Sm<sup>R</sup> cells through a single nucleotide change in which the involved mismatch (A:G) is expected  
8 to be poorly recognized and thus left unrepaired in cells bearing an intact MMR machinery. On the other  
9 hand, recombineering of the NR oligonucleotide should generate NaI<sup>R</sup> cells but the G:T and C:A  
10 mismatches could be readily recognized and fixed by MMR. The expected outcome of these  
11 experiments in the wild type background of *P. putida* EM42 (pSEVA2514-*rec2*) should thus show much  
12 higher recombineering efficiency with SR than with NR. In contrast, when the MMR system is  
13 impaired—whether permanently in strain *P. putida*  $\Delta$ *mutS* (pSEVA2514-*rec2*) or transiently in *P. putida*  
14 EM42 (pSEVA2514-*rec2*-*mutL*<sub>E36K</sub><sup>PP</sup>) the frequencies of allelic replacements using SR and NR should  
15 converge.

16

17 These predictions were not only confirmed by the data of Fig. 2B, but the results also allowed  
18 quantification of the recombineering efficiencies under the various conditions. Specifically, Fig. 2B  
19 revealed a difference of two orders of magnitude between Sm<sup>R</sup> and NaI<sup>R</sup> clones resulting from the  
20 recombineering experiments with the wild-type strain *P. putida* EM42 (pSEVA2514-*rec2*) and SR/NR  
21 oligos, respectively. In contrast, the frequencies of NaI<sup>R</sup> resistant clones in *P. putida*  $\Delta$ *mutS*  
22 (pSEVA2514-*rec2*) upon transformation with the NR oligonucleotide increased to the levels of the Sm<sup>R</sup>  
23 clones of the same strain treated with the SR oligo. These data confirmed that MMR is altogether  
24 eliminated in the  $\Delta$ *mutS* strain and that this lesion abolishes any bias in mispair recognition and  
25 repairing process. Finally, when the MutL<sub>E36K</sub><sup>PP</sup> protein was overexpressed in strain *P. putida* EM42  
26 (pSEVA2514-*rec2*-*mutL*<sub>E36K</sub><sup>PP</sup>) the frequencies of Sm<sup>R</sup> and NaI<sup>R</sup> resulting respectively from treatments  
27 with the SR and NR oligos were very similar. Taken together, the results of Fig. 2 showed that the  
28 inherent activity of the MMR native of *P. putida* clearly discriminates different types of mismatches (in  
29 the case tested: low activity against A:G and high activity against G:T + C:A) which can be transiently  
30 and effectively silenced *in vivo* upon expression of the dominant negative allele E36K of *mutL*. On this

1 basis we set out to explore the whole landscape of single-nucleotide mispairings allowed or not in *P.*  
2 *putida*, as explained next.

3

4 *Rationale for unraveling the hierarchy of the MMR system of P. putida*

5

6 In order to characterize the bias in the detection/repair of single nucleotide changes by the MMR system  
7 of *P. putida*, a set of four mutagenic oligonucleotides targeting the *pyrF* gene (PP\_1815) of *P. putida*  
8 were designed. This gene, which is equivalent to yeast's URA3, encodes orotidine 5'-phosphate  
9 decarboxylase and its inactivation makes cells to become resistant to fluoroorotic acid (5FOA<sup>R</sup>; (Galvao  
10 and de Lorenzo, 2005). The oligos for mutagenic recombineering of *pyrF* share the same sequence  
11 within the gene but bear four distinct positions fully degenerated (Supplementary Table S1, Fig. 3A),  
12 targeting nucleotides A (oligo PYR\_A), C (oligo PYR\_C), T (oligo PYR\_T) and G (oligo PYR\_G). The  
13 oligonucleotides encode also in all cases a C→A change which turns GAA codon E58 into TAA (Stop)  
14 in the midst of the *pyrF* ORF. When incorporated into the chromosome, this change thus generates cells  
15 with a truncated, non-functional *pyrF* gene, which become then uracil auxotrophs and 5FOA<sup>R</sup>. This set  
16 of oligonucleotides can therefore generate all possible mismatches *in vivo* during a ssDNA  
17 recombineering experiment, thereby exposing them to the endogenous MMR activity—whether fully  
18 active, fully inactive or transiently inhibited. While all mutants that have incorporated the oligos in the  
19 genome can be selected by growing the cells in the presence of uracil and 5FOA, the frequency of the  
20 accompanying changes can be quantified by PCR and deep sequencing of the targeted region of *pyrF*.

21

22 *Nucleotide mispairing preferences of the MMR system of P. putida EM42*

23

24 On the basis of the above, the predisposition of *P. putida* MMR system to recognize and repair different  
25 DNA mismatches and the ability of the MutL<sub>E36K</sub><sup>PP</sup> protein to effectively abrogate the bias was inspected.  
26 To this end, the oligos employed in the ssDNA recombineering experiments bear specific mismatches  
27 with the chromosomal DNA that are incorporated into the replication fork by the action of the Rec2  
28 recombinase. Since the endogenous MMR activity can repair the mismatches to various degrees, the  
29 frequency of 5FOA<sup>R</sup> mutants become a quantitative assay of MMR activity. Recombineering  
30 experiments were first performed with equimolar mixtures of PYR\_A/T/C/G oligonucleotides in the wild-  
31 type, MMR<sup>+</sup> background of strain *P. putida* EM42 (pSEVA2514-*rec2*) as explained in *Experimental*



1 procedures. After selection on M9-Citrate-Ura-5FOA plates, 500 colonies were reisolated in the same  
2 medium, then pooled together and genomic DNA extracted. This DNA pool was used as the template  
3 for amplification of *pyrF* gene by PCR and the resulting amplicons were analyzed by Illumina deep  
4 sequencing (see *Experimental Procedures* for details). Fig. 3B shows the relative frequency of the allelic  
5 replacements observed in this experiment, reflecting the bias of the wild-type *P. putida* EM42 MMR  
6 system to detect and repair single nucleotide mispairings. The results allowed us to establish the  
7 following hierarchy of mismatch recognition from less to more sensitive (and thus more to less  
8 permissive to changes) : A:G< C:C< G:A< C:A, A:A, G:G, T:T, T:G, A:C, C:T< G:T, T:C. This grading is  
9 comparable, but not identical, to that found in *E. coli* (Kramer *et al.*, 1984; Nyerges *et al.*, 2016).  
10 Similarly to this species of reference, the MMR system of *P. putida* EM42 shows very low sensitivity to  
11 A:G and C:C mismatches (Babic *et al.*, 1996; Nyerges *et al.*, 2016). However, the T:T mismatch is  
12 poorly recognized/repared in *P. putida* while the MMR system of *E. coli* has a much higher sensitivity to  
13 it. On the other hand, G:T and T:C mismatches have remarkably high repair rates in *P. putida* EM42  
14 (i.e., less permissive), while *E. coli* do not show such noticeable differences. All in all, the MMR  
15 discrimination encompasses three orders of magnitude i.e. from A:G (39.7 % efficiency) vs. to T:C (0.02  
16 %). According to these data, C:A/G:T, the mismatches involved in the Na<sup>R</sup> phenotype mediated by NR  
17 oligonucleotide (Fig. 2B) should be highly sensitive to MMR, but in fact the difference with the upper  
18 extreme is only two logs—surely due to the presence of the second C:A mismatch in the NR oligo. This  
19 can be explained in light of (Sawitzke *et al.*, 2011), namely, if two mismatches become simultaneously  
20 incorporated, the MMR recognizes them differently from the individual mutations, a phenomenon that  
21 seems to occur also in *P. putida*. Note also that MMR action on the mismatches occurs always in the  
22 newly synthesized strand that incorporates the mutagenic oligonucleotide. As commented in the  
23 Introduction above, this hints towards a mechanism of template/newly synthesized DNA discrimination  
24 in *P. putida* which cannot depend on *dam* methylation, an open question that deserves further studies.

25

26 To clarify the role of MMR in the recognition/repair just described, the same recombineering  
27 experiments were performed with strains *P. putida*  $\Delta$ *mutS* (pSEVA2514-*rec2*) and *P. putida* EM42  
28 (pSEVA2514-*rec2-mutL*<sub>E36K<sup>PP</sup></sub>) and the results were plotted along with those with the wild-type stain  
29 (Fig. 4A). A heatmap with the mean values of the resulting allelic replacements is shown in Fig. 4B. Both  
30 using of the MMR defective strain and heat induction of the *mutL*<sub>E36K<sup>PP</sup></sub> allele resulted in remarkable  
31 reduction of the recognition/repair bias of *P. putida* MMR system (Supplementary Fig. S3 shows

1 detailed information of the allelic replacement frequencies obtained). However, inspection of the actual  
2 figures of 5FOA<sup>R</sup> mutants indicated that a complete loss of MMR largely equalizes, but does not  
3 completely abolish, the bias towards stable inheritance of mutations generated by mispairings. Yet, the  
4 differential rate of repair in the MMR<sup>+</sup> strain between high and low sensitive mismatches is close to  
5 1000-fold, while the permanent or transient removal of MMR reduces the distance to not more than 4-  
6 fold (see Supplementary Fig. S3 for details). The rates of allelic replacements in mismatches very  
7 sensitive to MMR repair are particularly important in strain *P. putida* EM42 (pSEVA2514-*rec2*-  
8 *mutL*<sub>E36K</sub><sup>PP</sup>) as they increase to 7% in the case of G:T (compared to a mere 0.04% in the wild-type host)  
9 and to 5% for T:C (0.02% in the MMR<sup>+</sup> strain). These data not only sheds light on the recognition  
10 preference and fixing of nucleotide mismatches in *P. putida* but also accredit the dominant negative  
11 activity of MutL<sub>E36K</sub><sup>PP</sup> in this species and suggest general method for momentarily suppressing MMR in  
12 bacteria subjected to a recombineering protocol.

13

#### 14 *Transient expression of mutL<sub>E36K</sub><sup>PP</sup> inhibits MMR but does not cause whole-genome mutagenesis*

15

16 As indicated in Supplementary Fig. S2A, the loss of *mutS* multiplies the spontaneous mutagenesis rate  
17 of *P. putida* by at least 2 orders of magnitude as revealed with a simple count of Rif<sup>R</sup> mutants in the  
18 population. One remaining question regarding the recombineering results above was whether the same  
19 could be brought about by the transient thermoinduction of *mutL*<sub>E36K</sub><sup>PP</sup> during the period of time involved  
20 in the recombineering experiments. This piece of information is of essence for judging whether plasmid  
21 pSEVA2514-*rec2*-*mutL*<sub>E36K</sub><sup>PP</sup> could be a useful construct for implementing specific single-nucleotide  
22 changes in the genome of *P. putida* through Rec2-mediated recombineering without the complication of  
23 suspecting off-target, concurrent mutations. To sort this out we first adopted a Rif<sup>R</sup> fluctuation-like assay  
24 for quantifying the impact of inhibiting the MMR system in the mutational rate of the strains under study.  
25 Fig. 5 shows that overexpression *mutL*<sub>E36K</sub><sup>PP</sup> had a minor effect on the frequency of spontaneous  
26 appearance of Rif<sup>R</sup> clones of *P. putida* EM42. In contrast, the  $\Delta$ *mutS* strain under the same conditions  
27 exhibited >100 fold increase in mutations leading to Rif<sup>R</sup> compared to the wild-type *P. putida*, a value in  
28 agreement with the earlier data shown in Supplementary Fig. S2A. In order to assess further the  
29 appearance of random mutations during the transient inactivation of the MMR system with *mutL*<sub>E36K</sub><sup>PP</sup>,  
30 two Sm<sup>R</sup> and two Nal<sup>R</sup> colonies recovered from recombineering experiments of strain *P. putida* EM42  
31 (pSEVA2514-*rec2*-*mutL*<sub>E36K</sub><sup>PP</sup>) with SR and NR oligonucleotides, respectively, were submitted to whole

1 genome sequencing. In addition, a Sm<sup>R</sup> clone originated in the treatment of the control *P. putida* EM42  
2 (pSEVA2514-*rec2*) strain expressing only Rec2 was also analyzed. Genomic DNA of each of the 5  
3 strains was purified and sequenced by Illumina. As shown in Supplementary Table S2, zero to three  
4 SNPs were detected in strains transiently expressing *mutL*<sub>E36K</sub><sup>PP</sup>, while no mutations could be observed  
5 in the control MMR<sup>+</sup> strain. This demonstrated a very low level of spontaneous mutations when  
6 transiently inhibiting the MMR system of *P. putida*— low enough to consider thermoinduction of  
7 *mutL*<sub>E36K</sub><sup>PP</sup> an ideal asset for implementing high-efficiency genome editing methods in *P. putida*.

8

### 9 *Conclusion*

10

11 The results of the experiments described above provide three valuable pieces of information on how *P.*  
12 *putida* handles mismatches in the DNA helix of its genomic DNA caused by replication errors,  
13 misincorporation of damaged bases or (as exploited in this work) deliberate mispairings artificially  
14 introduced by means of recombineering strategies. The advantage of the last is that one can  
15 recapitulate all possible changes in a controlled fashion, as we have done in the present work. **First**, *P.*  
16 *putida* has an active MMR system that includes at least the *mutS* and *mutL* homologs of *E. coli* and  
17 brings about a distinct hierarchy of mismatch recognition and suppression. But possibly, the MMR  
18 system of *P. putida* (as is the case with *P. aeruginosa* (Oliver *et al.*, 2002)) comprises other activities as  
19 well: permanent or transient suppression of these genes dramatically reduce, but does not entirely  
20 eliminate the bias in tolerance to different types of mismatches. **Second**, as in any MMR device known  
21 in other bacteria, the system discriminates the old template strand of DNA from the newly synthesized  
22 sequence that bears the mismatched nucleotide. How this happens in the absence of *dam* methylation  
23 is unknown, although similarly to the case of *Bacillus* it could involve the beta clamp of the replication  
24 machinery (Simmons *et al.*, 2008). And **third**, transient expression of the dominant negative E36K of  
25 *mutL* along with the *rec2* recombinase (any possibly any other ssDNA recombinase active in this  
26 species) creates a window of opportunity for introduction of all types of chromosomal single-base  
27 changes without significant offsite mutations. This property, empowered by plasmid pSEVA2514-*rec2*-  
28 *mutL*<sub>E36K</sub><sup>PP</sup> (Fig. 1) will enable expansion of advanced methods of recombineering-based genome  
29 engineering such as DIVERGE (Nyerges *et al.*, 2018) or pORTMAGE-based technology (Nyerges *et al.*,  
30 2016) towards this environmentally and biotechnologically important bacterium.

31

1 EXPERIMENTAL PROCEDURES

2

3 *Strains, media and general procedures*

4

5 Liquid LB was used as routine growth media (10 g l<sup>-1</sup> tryptone, 5 g l<sup>-1</sup> yeast extract, and 5 g l<sup>-1</sup> NaCl) for  
6 *E. coli* and *P. putida* strains used in this study (Table 1). Glycerol-free Terrific Broth (TB; 12 g l<sup>-1</sup>  
7 tryptone, 24 g l<sup>-1</sup> yeast extract, 2 g l<sup>-1</sup> KH<sub>2</sub>PO<sub>4</sub>, 9.4 g l<sup>-1</sup> K<sub>2</sub>HPO<sub>4</sub>) was used for after-electroporation  
8 recovery during recombineering experiments. Bacterial strains were cultivated with shaking (170 rpm) at  
9 30 °C (*P. putida*) or 37 °C (*E. coli*). M9 minimal media (Sambrook *et al.*, 1989) was supplemented, when  
10 stated, with 0.2% w/v citrate for *P. putida* growth. Solid media was prepared adding 15 g/L of agar to  
11 liquid media. When necessary, liquid and solid media were supplemented with 50 µg ml<sup>-1</sup> of kanamycin  
12 (Km), 15 µg ml<sup>-1</sup> of gentamicin (Gm), 30 µg ml<sup>-1</sup> of chloramphenicol (Cm), 100 µg ml<sup>-1</sup> of streptomycin  
13 (Sm), 100 µg ml<sup>-1</sup> rifampicin (Rif), 50 µg ml<sup>-1</sup> of nalidixic acid (Nal), 20 µg ml<sup>-1</sup> of Uracil (Ura) or 250 µg  
14 ml<sup>-1</sup> of 5-fluoroorotic acid (5-FOA). Standard DNA manipulations were conducted according to  
15 manufacturer recommendations and previously established protocols (Sambrook *et al.*, 1989). Gibson  
16 Assembly was carried out as outlined in (Aparicio *et al.*, 2017) using a home-made reaction mixture.  
17 Genomic DNA was isolated with the DNAeasy® UltraClean® Microbial Kit (Qiagen). Following  
18 manufacturer recommendations, PCR amplifications for cloning purposes were performed with Q5  
19 polymerase (New England Biolabs) while DNA Amplitools Master Mix was used for diagnosis PCRs.  
20 Plasmids were introduced in *P. putida* strains via tripartite mating as described in (Martinez-Garcia and  
21 de Lorenzo, 2012). Oligonucleotides were purchased from Sigma with the exception of PYR\_C, PYR\_A,  
22 PYR\_G, PYR\_T and all PCR primers used for *pyrF* deep sequencing, which were synthesized at the  
23 Nucleic Acid Synthesis Laboratory of the Biological Research Centre, Hungarian Academy of Sciences,  
24 Szeged (Hungary) and purified using high-performance liquid chromatography (HPLC). Primers were  
25 suspended in 1× Tris-EDTA (TE) buffer (pH 8.0) at 100 µM final concentration.

26

27 *Plasmid construction*

28

29 To obtain pSEVA2514-*rec2*, in which the *rec2* recombinase is under the control of the heat-inducible  
30 *cl857-P<sub>L</sub>* expression system, the *xyIS-P<sub>m</sub>* induction module of pSEVA258-*rec2* was substituted with the  
31 thermo-inducible expression module of pSEVA2514. Both plasmids were restricted with PacI/AvrII and

1 the 6.0 Kb of band of pSEVA258-*rec2* was ligated to the 1.4 Kb band of pSEVA2514 and the ligation  
2 transformed in *E. coli* CC118. For the construction of pSEVA2514-*rec2-mutL*<sub>E36K</sub><sup>PP</sup>, in which *mutL*<sub>E36K</sub><sup>PP</sup>  
3 allele is co-expressed with *rec2*, the corresponding sequence was first assembled in the pSEVA258-*ssr*  
4 and later on transferred to pSEVA2514-*rec2*. pSEVA258-*ssr-mutL*<sub>E36K</sub><sup>PP</sup> was generated as follows: first,  
5 *mutL* of *P. putida* KT2440 (2.0 Kb) was colony amplified with oligos *mutL*-KT-Fw/*mutL*-KT-Rv (T<sub>m</sub>= 65  
6 °C, 1 min. elongation, Q5 polymerase). This PCR fragment was Gibson assembled with BamHI/SphI  
7 restricted pSEVA258-*ssr* and the assembly mix transformed in *E. coli* CC118. The resulting pSEVA258-  
8 *ssr-mutL* was used as a template for amplifying two fragments: a 0.9 Kb fragment containing the 3'-end  
9 of *ssr* and the 5'-end of *mutL* with Gibson-PP-Beta-Fw/ *mutL*KT-Gibson-2 (T<sub>m</sub>= 60 °C, 30 sec.  
10 elongation, Q5 polymerase) and a fragment containing a 0.4 Kb segment of *mutL* with *mutL*KT-Gibson-  
11 3/ *mutL*KT-Gibson-4 (T<sub>m</sub>= 71 °C, 30 sec. elongation, Q5 polymerase). *mutL*KT-Gibson-2 and *mutL*KT-  
12 Gibson-3 primers incorporate the single nucleotide change responsible of the amino acid change  
13 E36→K36 in the *mutL* ORF to generate *mutLE36K*. pSEVA258-*ssr-mutL* was cut with EcoRI and the  
14 8.4 Kb fragment, containing the 5'-end of *ssr* and the 3'-end of *mutL*, was Gibson assembled with the  
15 two PCR fragments described above to eventually generate pSEVA258-*ssr-mutL*<sub>E36K</sub><sup>PP</sup>. Finally, this  
16 plasmid was used as a template for amplifying *mutL*<sub>E36K</sub> with primers *mutLE36K*-Gib-Fw/ *mutLE36K*-  
17 Gib-Rv (T<sub>m</sub>= 65 °C, 1 min. Elongation, Q5 polymerase) and the resulting 2.0 Kb fragment was Gibson  
18 assembled with pSEVA2514-*rec2* restricted with XbaI/HindIII. The assembly mix was transformed in *E.*  
19 *coli* CC118 to obtain pSEVA2514-*rec2-mutL*<sub>E36K</sub><sup>PP</sup>. pSEVA231-C-*mutS*1 bears a CRISPR array with a  
20 spacer targeting the *mutS* gene of *P. putida* KT2440. Spacer design and cloning was performed as  
21 described previously (Aparicio *et al.*, 2018, 2019a). Briefly, oligonucleotides cr-*mutS*-S-1 and cr-*mutS*-  
22 AS-1 were annealed and the resulting dsDNA fragment was ligated into pSEVA231-CRISPR restricted  
23 with BsaI. Ligation was transformed in *E. coli* CC118. All plasmids constructed in this work, either by  
24 Gibson Assembly or by restriction/ligation, were transformed in *E. coli* CC118 calcium chloride  
25 competent cells, selected in LB-Km solid media and colonies checked by miniprep+restriction. Inserts  
26 were fully sequenced (Macrogen Spain) to verify the accuracy of the constructs.

27

28 *Construction of P. putida EM42 ΔmutS strain by recombineering/CRISPR-Cas9*

29

30 The deletion protocol described in (Aparicio *et al.*, 2018) was applied on *P. putida* EM42 bearing  
31 pSEVA658-*ssr* and pSEVA421-Cas9tr plasmids. Recombineering with MAGE-*mutS*-2 oligonucleotide

1 and CRISPR-Cas9 counterselection with pSEVA231-C-mutS1 plasmid was used to delete a 0.7 Kb  
2 segment of the *mutS* gene (PP\_1626) of *P. putida* EM42. One out of fifty colonies checked by PCR with  
3 primers mutS-check3/ mutS-check4 (Tm= 55 °C, 30 seconds elongation) yielded the 0.6 Kb fragment  
4 expected for the deletion mutant.

5

#### 6 *Rifampicin Assay*

7

8 The mutational rate of *P. putida* EM42  $\Delta$ *mutS* and its parental strain (*P. putida* EM42) was estimated by  
9 monitoring the appearance of rifampicin resistant (Rif<sup>R</sup>) colonies. Overnight cultures grown in LB were  
10 adjusted to OD<sub>600</sub> ≈ 1.0 and 1 ml (~10<sup>9</sup> cells) of each sample was centrifuged 1 minute at 11.000 rpm.  
11 The pellets were re-suspended in 100 µl of LB and plated on LB-Rif solid media. Rif<sup>R</sup> colonies were  
12 counted after 24 hours of incubation at 30 °C. Two independent replicas were done and the medias and  
13 standard deviations were represented as the frequencies of Rif<sup>R</sup> mutants per 10<sup>9</sup> cells.

14

#### 15 *ssDNA recombineering protocol mediated by thermal induction*

16

17 Recombineering experiments were accomplished basically as described in (Ricaurte *et al.*, 2018). Some  
18 modifications were implemented to trigger the activation of the thermo-inducible *cl857-P<sub>L</sub>* expression  
19 system of pSEVA2514 derivatives driving the expression of *rec2* and *mutL<sub>E36K</sub><sup>PP</sup>* genes. Overnight  
20 cultures of *P. putida* EM42 bearing the plasmids under study were back-diluted to OD<sub>600</sub>= 0.1 in a total  
21 volume of 20 ml of LB-Km in 100 ml Erlenmeyer flasks. Cultures were incubated at 30 °C/ 170 rpm until  
22 OD<sub>600</sub>= 0.4-0.5. Then, flasks were transferred to a water bath at 42 °C for 5 minutes with gentle shaking  
23 to increase quickly the temperature and induce the expression of Rec2/ MutL<sub>E36K</sub><sup>PP</sup> proteins. Flasks  
24 were incubated 10 additional minutes at 42 °C in an air shaker at 250 rpm (15 minutes of total induction  
25 at 42 °C) and then cooled down in ice for 5 minutes to stop the thermal induction. When stated, different  
26 induction times were applied with shorter or longer incubations in the air shaker. Competent cells were  
27 prepared at RT by centrifuging cultures at 3220 g/ 5 minutes and washing the pellets three consecutive  
28 times with 10, 5 and 1 ml of 300 mM sucrose solution. Pellets were finally resuspended in 200 µl of the  
29 same solution. One hundred microliters of this suspension were added with 1 µl of the recombineering  
30 oligonucleotide (stock at 100 mM), mixed thoroughly and the mixture transferred to an electroporation 2  
31 mm-gap width cuvette (Bio-Rad). Electrotransformation was performed in a Micropulser™ device (Bio-

1 Rad Laboratories, Hercules, CA, USA) at 2.5 kV and cultures were immediately inoculated in 5 ml of  
2 fresh TB and recovered overnight at 30 °C/ 170 rpm. Several dilutions of the recovered cultures were  
3 plated in the appropriate selective and non-selective solid media depending on the current experiment  
4 (see below).

5

#### 6 *ssDNA recombineering experiments with SR and NR oligonucleotides*

7

8 Recombineering with oligonucleotides SR (A:G mismatch, low MMR sensitivity; A→C change produces  
9 a Sm-resistant phenotype) and NR (G:T and C:A mismatches, low and high MMR sensitivity,  
10 respectively; G→A and C→T changes produce a Nal-resistant phenotype) was performed as  
11 described in the previous section on strains *P. putida* EM42/ pSEVA2514-*rec2* (WT- wild type MMR  
12 system), *P. putida* EM42Δ*mutS*/ pSEVA2514-*rec2* (Δ*mutS*- inactive MMR system) and *P. putida* EM42/  
13 pSEVA2514-*rec2*- *mutL*<sub>E36K</sub><sup>PP</sup> (transient MMR inactivation upon expression of *mutL*<sub>E36K</sub><sup>PP</sup> protein). After  
14 overnight recovery, dilutions 10<sup>-2</sup>, 10<sup>-3</sup>, 10<sup>-4</sup> and 10<sup>-5</sup> of SR and NR electroporated cultures were plated  
15 on LB-Sm and LB-Nal, respectively, to select cells harbouring the allelic replacements. To estimate the  
16 number of viable cells, dilutions 10<sup>-7</sup> and 10<sup>-8</sup> of were plated on LB. Plates were incubated 18 hours at  
17 30 °C and absolute colony counts were taken. The recombineering frequency (RF) was calculated as  
18 the ratio between the number of antibiotic-resistant colonies and the number of viable cells. This ratio  
19 was normalized to 10<sup>9</sup> viable cells. In order to check the accuracy of the allelic replacements, ten clones  
20 from each strain/oligonucleotide experiment were PCR amplified either for *rpsL* gene (Sm-resistant  
21 colonies coming from SR experiments- oligos rpsL-Fw/ rpsL-Rv, T<sub>m</sub>= 57 °C, 45 seconds elongation, 0.8  
22 Kb product) or for *gyrA* gene (Nal-resistant colonies from NR experiments-oligos gyrA-Fw/ gyrA-Rv,  
23 T<sub>m</sub>= 57 °C, 45 seconds elongation, 0.4 Kb product). PCRs were purified and sequenced with rpsL-Fw  
24 and gyrA-Fw, respectively (Macrogen Spain). All 60 clones analyzed showed the expected changes  
25 introduced by the recombineering oligonucleotides without additional mutations in the region  
26 sequenced.

27

#### 28 *MMR recognition hierarchy in P. putida EM42*

29

30 For a more detailed characterization of the MMR system of *P. putida* EM42, the three strains studied  
31 above were subjected to recombineering with a mixture of oligonucleotides PYR\_A, PYR\_C, PYR\_T

1 and PYR\_G. 10  $\mu$ l of each oligonucleotide at 100 mM were mixed and 2  $\mu$ l of the mixture (0.5  $\mu$ l of  
2 each oligonucleotide) were used for electrotransformation. The ssDNA recombineering protocol  
3 mediated by thermal induction was applied as explained before but cultures were allowed to recover  
4 only 5 hours at 30 °C/ 170 rpm since longer recovery times in *pyrF*-targeted experiments were reported  
5 to decrease the appearance of *pyrF*<sup>-</sup> mutants (Ricaurte *et al.*, 2018). After recovery, several dilutions of  
6 each culture (10<sup>-2</sup>, 10<sup>-3</sup>) were plated on M9-Citrate-Ura-5FOA and plates were incubated 48 hours at 30  
7 °C to allow the slow-growing *pyrF*<sup>-</sup> colonies to appear. Five hundred colonies were streaked in the same  
8 media and incubated as before. The 500 streaks were pooled together by suspension in 2 ml of water,  
9 the sample centrifuged 1 minute at 11.000 rpm and the pellets used for genomic DNA (gDNA) extraction  
10 with DNeasy® UltraClean® Microbial Kit (Qiagen). A negative control experiment was also performed  
11 with *P. putida* EM42/ pSEVA2514-*rec2* electroporated without any oligonucleotide. In this case, the  
12 post-electroporated culture was recovered 5 hours and plated in M9-Citrate-Ura-5FOA (10<sup>-1</sup> and 10<sup>-2</sup>  
13 dilutions) and M9-Citrate (10<sup>-5</sup> and 10<sup>-6</sup> dilutions). As expected, only few colonies appeared on the  
14 selective media, all of them showing the fast-growing phenotype typical of spontaneous mutants, non-  
15 *pyrF* related, described elsewhere (Galvao and de Lorenzo, 2005; Aparicio *et al.*, 2016). A pool of  
16 approximately 10.000 colonies rescued from the M9-Citrate plates were used for gDNA extraction and  
17 served as a control of the downstream process of deep amplicon sequencing of *pyrF*. An independent  
18 replica of this set of four experiments was performed and gDNA samples from both replicas were used  
19 to estimate the activity of the MMR system by deep amplicon sequencing of the *pyrF* targeted region.

20

### 21 *Deep amplicon sequencing of pyrF*

22

23 To determine the allelic composition of *pyrF* at the oligonucleotide-target site, we utilized a previously  
24 described Illumina MiSeq deep sequencing protocol (Nyerges *et al.*, 2016). To create Illumina  
25 sequencing libraries, a 138 nucleotide-long region of *pyrF* in *P. putida* that was targeted by  
26 recombineering-oligonucleotides (PYR\_G, PYR\_A, PYR\_T and PYR\_C), was PCR amplified from the  
27 previously isolated, pooled gDNA samples using the corresponding barcoded primer pairs specifically  
28 designed for each experiment/sample (Supplementary Table S1). To multiplex sequencing samples on  
29 Illumina MiSeq, barcoded PCR primers were designed based on a previously published protocol (Kozich  
30 *et al.*, 2013) and consisted of the appropriate Illumina adaptor sequences, a 10 nucleotide-long pad  
31 sequence, and a 2 nucleotide-long linker besides the terminal genomic target-specific primer



1 sequences. Besides barcoded PCR primers, custom Illumina sequencing primers according to (Kozich  
2 *et al.*, 2013) were also designed (Supplementary Table S1). Next, the *pyrF* oligo-target region from  
3 each gDNA sample was amplified in 4×25 µl volumes, consisting of 50 µl 2× Q5 Hot-Start MasterMix  
4 (New England Biolabs), 2 µl of the corresponding sample-specific, barcoded, reverse Illumina primer  
5 (100 µM) plus 2 µl PYR\_ILMF (100 µM) primer, 200 ng template gDNA and 45 µl nuclease-free H<sub>2</sub>O.  
6 PCRs were performed in thin-wall PCR tubes in a BioRad CFX96 qPCR machine with the following  
7 thermal profile: 98 °C 3 minutes, 23 cycles of (98 °C 15 seconds, 62 °C 20 seconds, 72 °C 20 seconds)  
8 and a final extension of 72 °C for 5 minutes. Following PCRs, the 180 basepair-long amplicons were  
9 purified by using a Zymo Research DNA Clean and Concentrator™ Kit according to the manufacturer's  
10 protocol (Zymo Research) and eluted in in 30 µl 1× Tris-EDTA (TE) buffer (pH 8.0). To prepare samples  
11 for sequencing, amplicons were quantified using Qubit dsDNA BR assay kit (Thermo Fisher Scientific),  
12 mixed, and libraries were sequenced on an Illumina MiSeq instrument using v2 paired-end 2×250-cycle  
13 sequencing kit (Illumina). To perform sequencing, the Illumina MiSeq cartridges were supplemented  
14 with 100 µM stocks of our custom Illumina sequencing primers (Supplementary Table S1). After  
15 sequencing, raw sequencing reads were de-multiplexed according to their corresponding barcodes. The  
16 average sequencing read counts were 160000 per sample. Next, the overlapping read-pairs were  
17 identified and merged to yield one template-read from each combined sequencing read using pandaseq  
18 v2.8 (Masella *et al.*, 2012). Reads were then trimmed to an error probability threshold of 0.001 (Phred  
19 quality = 30) using readtools 1.5.2 (Gomez-Sanchez and Schlotterer, 2018). Merged paired-end reads  
20 were then mapped to their corresponding reference sequence (*P. putida pyrF*-PP\_1815) by using  
21 bowtie2 2.3.4 (Langmead) in "--very-sensitive-local" mode and the nucleotide composition was extracted  
22 for each nucleotide position within the oligo-targeted region. Allelic replacement frequencies at each  
23 oligo-targeted nucleotide positions were quantified by measuring the distribution and ratio of nucleotide  
24 substitutions for each reference nucleotide position (Nyerges *et al.*, 2016). Finally, the allelic  
25 replacement frequency of each individual substitution was normalized to the sum of all substitutions  
26 detected in the experiment. Data from two independent replicas of each experimental condition were  
27 used to calculate medias and standard deviations.

28

### 29 *Mutational rate measurement by a fluctuation-like assay*

30

31 A rifampicin resistance fluctuation assay was performed with *P. putida* EM42 (pSEVA2514-*rec2*) *P.*

1 *putida*  $\Delta mutS$  (pSEVA2514-*rec2*) and *P. putida* EM42 (pSEVA2514-*rec2*- *mutL*<sub>E36K</sub><sup>PP</sup>). The strains were  
2 inoculated in 3 ml of LB-Km and incubated overnight at 30 °C/170 rpm. In order to mimic the  
3 experimental conditions of a standard recombineering experiment, overnight cultures were back-diluted  
4 to OD<sub>600</sub> ~ 0,1 in 3 ml fresh LB-Km and incubated at 30 °C/170 rpm until OD<sub>600</sub> ~ 0,5. Cultures were  
5 then placed in a water bath at 42 °C for 5 minutes with gentle shaking, transferred to an air shaker at 42  
6 °C/ 250 rpm/ 10 min (total incubation at 42 °C= 15 min) and incubated at 4 °C for 5 min. After overnight  
7 growth at 30 °C/170 rpm aliquots of each culture were plated on LB and LB-Rif and plates incubated 24  
8 hours at 30 °C. Total colony count was done and the data from fifteen independent replicas of the  
9 experiment were used to calculate the mutational rate of each strain by using the Ma-Sandri-Sarkar  
10 Maximum Likelihood Estimator method and the FALCOR web tool (Hall *et al.*, 2009).

11

#### 12 *Whole genome sequencing and bioinformatics for SNPs detection*

13

14 Genomic DNA samples of *P. putida* EM42 query strains were sequenced in Macrogen Inc. (Korea).  
15 Truseq PCR Free Libraries of 350 bp were processed in Illumina Hiseq2500 (2x100 bp) flow cells  
16 (output coverage ~900x). Quality of raw data was analyzed using FASTQ files with FastQC tool  
17 (<https://www.bioinformatics.babraham.ac.uk/projects/fastqc/>). No quality issues were detected and  
18 Illumina reads were aligned to *P. putida* KT2440 genome (NC 002947.4) using "bwa aln" and "bwa  
19 sampe" commands with default parameters (Li and Durbin, 2010). Alignment files in SAM format were  
20 compressed, coordinate-sorted and indexed using "samtools view -bS", "samtools sort" and "samtools  
21 index" commands, respectively (Li *et al.*, 2009). Before coordinate-sorted step, duplicated reads (paired  
22 reads aligning exactly at the same genomic coordinates, considered as PCR artifacts) were removed  
23 with "samtools rmdup" command. Since the genome of *P. putida* EM42 contains 10 deletions of variable  
24 size compared with the reference genome of *P. putida* KT2440, genomic regions with no coverage were  
25 detected in SAM/BAM files using "bedtools genomecov -bga" (Quinlan and Hall, 2010) and parsing the  
26 output with "grep -w 0\$". SNP detection was carried-out using "samtools mpileup -B" and "bcftools call -  
27 m" (Li, 2011). Biological impact of detected polymorphisms was determined with snpEff tool setting  
28 upstream and downstream gene regions 500 bp in size (- upDownStreamLen 500;Cingolani *et al.*,  
29 2012). Only variants with QUAL > 200 and coverage (DP) > 200 were considered for SNP validation.

30 -

31 ACKNOWLEDGEMENTS

1

2 This work was funded by the HELIOS Project of the Spanish Ministry of Science BIO 2015-66960-C3-2-  
3 R (MINECO/FEDER); the ARISYS (ERC-2012-ADG-322797), MADONNA (H2020-FET-OPEN-RIA-  
4 2017-1-766975), BioRoboost (H2020-NMBP-BIO-CSA-2018), and SYN BIO4FLAV (H2020-NMBP/0500)  
5 Contracts of the European Union and the S2017/BMD-3691 InGEMICS-CM funded by the Comunidad  
6 de Madrid (European Structural and Investment Funds). CS was supported by grants from the  
7 European Research Council H2020-ERC-2014-CoG 648364, the Wellcome Trust, GINOP-2.3.2-15-  
8 2016-00020, GINOP-2.3.2-15-2016-00014 and the Lendület Program of the Hungarian Academy of  
9 Sciences. AN was supported by a PhD fellowship from the Boehringer Ingelheim Fonds.

10

## 11 REFERENCES

12

- 13 Aparicio, T., de Lorenzo, V., and Martínez-García, E. (2017) Broadening the SEVA Plasmid Repertoire  
14 to Facilitate Genomic Editing of Gram-Negative Bacteria. In *Hydrocarbon and Lipid Microbiology*  
15 *Protocols: Genetic, Genomic and System Analyses of Pure Cultures*. McGenity, T.J., Timmis,  
16 K.N., and Nogales, B. (eds). Berlin, Heidelberg: Springer Berlin Heidelberg, pp. 9-27.
- 17 Aparicio, T., de Lorenzo, V., and Martinez-Garcia, E. (2018) CRISPR/Cas9-Based Counterselection  
18 Boosts Recombineering Efficiency in *Pseudomonas putida*. *Biotechnol J* **13**: e1700161.
- 19 Aparicio, T., de Lorenzo, V., and Martinez-Garcia, E. (2019a) CRISPR/Cas9-enhanced ssDNA  
20 recombineering for *Pseudomonas putida*. *Microb Biotechnol*. doi: 10.1111/1751-7915.13453.
- 21 Aparicio, T., de Lorenzo, V., and Martinez-Garcia, E. (2019b) Improved Thermotolerance of Genome-  
22 Reduced *Pseudomonas putida* EM42 Enables Effective Functioning of the PL /cl857 System.  
23 *Biotechnol J* **14**: e1800483.
- 24 Aparicio, T., Jensen, S.I., Nielsen, A.T., de Lorenzo, V., and Martinez-Garcia, E. (2016) The Ssr protein  
25 (T1E\_1405) from *Pseudomonas putida* DOT-T1E enables oligonucleotide-based  
26 recombineering in platform strain *P. putida* EM42. *Biotechnol J* **11**: 1309-1319.
- 27 Aronshtam, A., and Marinus, M.G. (1996) Dominant negative mutator mutations in the *mutL* gene of  
28 *Escherichia coli*. *Nucleic Acids Res* **24**: 2498-2504.
- 29 Babic, I., Andrew, S.E., and Jirik, F.R. (1996) MutS interaction with mismatch and alkylated base  
30 containing DNA molecules detected by optical biosensor. *Mutat Res* **372**: 87-96.

- 1 Ban, C., and Yang, W. (1998) Crystal structure and ATPase activity of MutL: implications for DNA repair  
2 and mutagenesis. *Cell* **95**: 541-552.
- 3 Boyer, H.W., and Roulland-Dussoix, D. (1969) A complementation analysis of the restriction and  
4 modification of DNA in *Escherichia coli*. *J Mol Biol* **41**: 459-472.
- 5 Cingolani, P., Platts, A., Wang le, L., Coon, M., Nguyen, T., Wang, L. et al. (2012) A program for  
6 annotating and predicting the effects of single nucleotide polymorphisms, SnpEff: SNPs in the  
7 genome of *Drosophila melanogaster* strain w1118; iso-2; iso-3. *Fly (Austin)* **6**: 80-92.
- 8 Galvao, T.C., and de Lorenzo, V. (2005) Adaptation of the yeast URA3 selection system to gram-  
9 negative bacteria and generation of a  $\Delta betCDE$  *Pseudomonas putida* strain. *Appl Environ*  
10 *Microbiol* **71**: 883-892.
- 11 Gomez-Sanchez, D., and Schlotterer, C. (2018) ReadTools: A universal toolkit for handling sequence  
12 data from different sequencing platforms. *Mol Ecol Resour* **18**: 676-680.
- 13 Hall, B.M., Ma, C.X., Liang, P., and Singh, K.K. (2009) Fluctuation analysis CalculatOR: a web tool for  
14 the determination of mutation rate using Luria-Delbruck fluctuation analysis. *Bioinformatics* **25**:  
15 1564-1565.
- 16 Joshi, A., and Rao, B.J. (2001) MutS recognition: multiple mismatches and sequence context effects. *J*  
17 *Biosci* **26**: 595-606.
- 18 Kessler, B., de Lorenzo, V., and Timmis, K.N. (1992) A general system to integrate *lacZ* fusions into the  
19 chromosomes of gram-negative eubacteria: regulation of the *Pm* promoter of the TOL plasmid  
20 studied with all controlling elements in monocopy. *Mol Gen Genet* **233**: 293-301.
- 21 Kozich, J.J., Westcott, S.L., Baxter, N.T., Highlander, S.K., and Schloss, P.D. (2013) Development of a  
22 dual-index sequencing strategy and curation pipeline for analyzing amplicon sequence data on  
23 the MiSeq Illumina sequencing platform. *Appl Environ Microbiol* **79**: 5112-5120.
- 24 Kramer, B., Kramer, W., and Fritz, H.-J. (1984) Different base/base mismatches are corrected with  
25 different efficiencies by the methyl-directed DNA mismatch-repair system of *E. coli*. *Cell* **38**:  
26 879-887.
- 27 Kureishi, A., Diver, J.M., Beckthold, B., Schollaardt, T., and Bryan, L.E. (1994) Cloning and nucleotide  
28 sequence of *Pseudomonas aeruginosa* DNA gyrase *gyrA* gene from strain PAO1 and  
29 quinolone-resistant clinical isolates. *Antimicrob Agents Chemother* **38**: 1944-1952.
- 30 Li, H. (2011) A statistical framework for SNP calling, mutation discovery, association mapping and  
31 population genetical parameter estimation from sequencing data. *Bioinformatics* **27**: 2987-2993.

- 1 Li, H., and Durbin, R. (2010) Fast and accurate long-read alignment with Burrows-Wheeler transform.  
2 *Bioinformatics* **26**: 589-595.
- 3 Li, H., Handsaker, B., Wysoker, A., Fennell, T., Ruan, J., Homer, N. et al. (2009) The Sequence  
4 Alignment/Map format and SAMtools. *Bioinformatics* **25**: 2078-2079.
- 5 Long, H., Miller, S.F., Williams, E., and Lynch, M. (2018) Specificity of the DNA Mismatch Repair  
6 System (MMR) and Mutagenesis Bias in Bacteria. *Mol Biol Evol* **35**: 2414-2421.
- 7 Long, H., Sung, W., Miller, S.F., Ackerman, M.S., Doak, T.G., and Lynch, M. (2014) Mutation rate,  
8 spectrum, topology, and context-dependency in the DNA mismatch repair-deficient  
9 *Pseudomonas fluorescens* ATCC948. *Genome Biol Evol* **7**: 262-271.
- 10 Manoil, C., and Beckwith, J. (1985) TnpA: a transposon probe for protein export signals. *Proc Natl*  
11 *Acad Sci U S A* **82**: 8129-8133.
- 12 Martinez-Garcia, E., and de Lorenzo, V. (2012) Transposon-based and plasmid-based genetic tools for  
13 editing genomes of Gram-negative bacteria. *Methods Mol Biol* **813**: 267-283.
- 14 Martinez-Garcia, E., Nikel, P.I., Aparicio, T., and de Lorenzo, V. (2014) *Pseudomonas 2.0*: genetic  
15 upgrading of *P. putida* KT2440 as an enhanced host for heterologous gene expression. *Microb*  
16 *Cell Fact* **13**: 159.
- 17 Masella, A.P., Bartram, A.K., Truszkowski, J.M., Brown, D.G., and Neufeld, J.D. (2012) PANDAseq:  
18 paired-end assembler for illumina sequences. *BMC Bioinformatics* **13**: 31.
- 19 Matson, S.W., and Robertson, A.B. (2006) The UvrD helicase and its modulation by the mismatch repair  
20 protein MutL. *Nucleic Acids Research* **34**: 4089-4097.
- 21 Nyerges, A., Csorgo, B., Nagy, I., Balint, B., Bihari, P., Lazar, V. et al. (2016) A highly precise and  
22 portable genome engineering method allows comparison of mutational effects across bacterial  
23 species. *Proc Natl Acad Sci U S A* **113**: 2502-2507.
- 24 Nyerges, A., Csorgo, B., Draskovits, G., Kintses, B., Szili, P., Ferenc, G. et al. (2018) Directed evolution  
25 of multiple genomic loci allows the prediction of antibiotic resistance. *Proc Natl Acad Sci U S A*  
26 **115**: E5726-E5735.
- 27 Oliver, A., Baquero, F., and Blázquez, J. (2002) The mismatch repair system (*mutS*, *mutL* and *uvrD*  
28 *genes*) in *Pseudomonas aeruginosa*: molecular characterization of naturally occurring mutants.  
29 *Mol Microbiol* **43**: 1641-1650.

- 1 Putnam, C.D. (2016) Evolution of the methyl directed mismatch repair system in *Escherichia coli*. *DNA*  
2 *Repair* **38**: 32-41.
- 3 Quinlan, A.R., and Hall, I.M. (2010) BEDTools: a flexible suite of utilities for comparing genomic  
4 features. *Bioinformatics* **26**: 841-842.
- 5 Ricaurte, D.E., Martinez-Garcia, E., Nyerges, A., Pal, C., de Lorenzo, V., and Aparicio, T. (2018) A  
6 standardized workflow for surveying recombinases expands bacterial genome-editing  
7 capabilities. *Microb Biotechnol* **11**: 176-188.
- 8 Sambrook, J., Fritsch, E.F., and Maniatis, T. (1989) *Molecular Cloning: A Laboratory Manual*. Cold  
9 Spring Harbor Press
- 10 Saumaa, S., Tarassova, K., Tark, M., Tover, A., Tegova, R., and Kivisaar, M. (2006) Involvement of  
11 DNA mismatch repair in stationary-phase mutagenesis during prolonged starvation of  
12 *Pseudomonas putida*. *DNA Repair* **5**: 505-514.
- 13 Sawitzke, J.A., Costantino, N., Li, X.T., Thomason, L.C., Bubunencko, M., Court, C., and Court, D.L.  
14 (2011) Probing cellular processes with oligo-mediated recombination and using the knowledge  
15 gained to optimize recombineering. *J Mol Biol* **407**: 45-59.
- 16 Simmons, L.A., Davies, B.W., Grossman, A.D., and Walker, G.C. (2008)  $\beta$  clamp directs localization of  
17 mismatch repair in *Bacillus subtilis*. *Molecular cell* **29**: 291-301.
- 18 Tark, M., Tover, A., Koorits, L., Tegova, R., and Kivisaar, M. (2008) Dual role of NER in mutagenesis in  
19 *Pseudomonas putida*. *DNA Repair* **7**: 20-30.
- 20 Wang, H.H., Isaacs, F.J., Carr, P.A., Sun, Z.Z., Xu, G., Forest, C.R., and Church, G.M. (2009)  
21 Programming cells by multiplex genome engineering and accelerated evolution. *Nature* **460**:  
22 894-898.
- 23 Wu, T.H., and Marinus, M.G. (1994) Dominant negative mutator mutations in the *mutS* gene of  
24 *Escherichia coli*. *J Bacteriol* **176**: 5393-5400.
- 25 Wyrzykowski, J., and Volkert, M.R. (2003) The *Escherichia coli* methyl-directed mismatch repair system  
26 repairs base pairs containing oxidative lesions. *J Bacteriol* **185**: 1701-1704.
- 27 Yoshida, H., Bogaki, M., Nakamura, M., and Nakamura, S. (1990) Quinolone resistance-determining  
28 region in the DNA gyrase *gyrA* gene of *Escherichia coli*. *Antimicrob Agents Chemother* **34**:  
29 1271-1272.

1 **Table 1.** Bacterial strains and plasmids used in this work.

2

| Strain or plasmid                                       | Relevant characteristics <sup>a</sup>                                                                                                                                                                                                                                                                        | Reference or source                    |
|---------------------------------------------------------|--------------------------------------------------------------------------------------------------------------------------------------------------------------------------------------------------------------------------------------------------------------------------------------------------------------|----------------------------------------|
| <i>Escherichia coli</i>                                 |                                                                                                                                                                                                                                                                                                              |                                        |
| CC118                                                   | Cloning host; $\Delta(ara-leu)$ <i>araD</i> $\Delta lacX174$ <i>galE</i> <i>galK</i> <i>phoA</i> <i>thiE1</i> <i>rpsE</i> (Sp <sup>R</sup> ) <i>rpoB</i> (Rif <sup>R</sup> ) <i>argE</i> (Am) <i>recA1</i>                                                                                                   | (Manoil and Beckwith, 1985)            |
| HB101                                                   | Helper strain used for conjugation; F <sup>-</sup> $\lambda^-$ <i>hsdS20</i> (rB <sup>-</sup> mB <sup>-</sup> ) <i>recA13</i> <i>leuB6</i> (Am) <i>araC14</i> $\Delta(gpt-proA)62$ <i>lacY1</i> <i>galK2</i> (Oc) <i>xyl-5</i> <i>mtl-1</i> <i>thiE1</i> <i>rpsL20</i> (Sm <sup>R</sup> ) <i>glnX44</i> (AS) | (Boyer and Roulland-Dussoix, 1969)     |
| <i>Pseudomonas putida</i>                               |                                                                                                                                                                                                                                                                                                              |                                        |
| EM42                                                    | KT2440 derivative; $\Delta$ prophage1 $\Delta$ prophage4 $\Delta$ prophage3 $\Delta$ prophage2 $\Delta$ Tn7 $\Delta$ endA-1 $\Delta$ endA-2 $\Delta$ hsdRMS $\Delta$ flagellum $\Delta$ Tn4652                                                                                                               | (Martinez-Garcia <i>et al.</i> , 2014) |
| EM42 $\Delta$ mutS                                      | EM42 derivative; $\Delta$ mutS                                                                                                                                                                                                                                                                               | This work                              |
| Plasmids                                                |                                                                                                                                                                                                                                                                                                              |                                        |
| pSEVA2514                                               | Inducible expression vector; <i>oriV</i> (RFS1010); cargo [cl857-P <sub>L</sub> ]; standard multiple cloning site; Km <sup>R</sup>                                                                                                                                                                           | (Aparicio <i>et al.</i> , 2019b)       |
| pSEVA258- <i>ssr</i>                                    | pSEVA258 derivative bearing the <i>ssr</i> recombinase; <i>oriV</i> (RFS1010); cargo [ <i>xyIS-Pm</i> $\rightarrow$ <i>ssr</i> ]; Km <sup>R</sup>                                                                                                                                                            | (Ricaurte <i>et al.</i> , 2018)        |
| pSEVA258- <i>ssr-mutL</i> <sub>E36K</sub> <sup>PP</sup> | pSEVA258 derivative bearing the <i>ssr</i> recombinase and <i>mutL</i> <sub>E36K</sub> <sup>PP</sup> allele; <i>oriV</i> (RFS1010); cargo [ <i>xyIS-Pm</i> $\rightarrow$ <i>ssr-mutL</i> <sub>E36K</sub> <sup>PP</sup> ]; Km <sup>R</sup>                                                                    | This work                              |
| pSEVA2514- <i>rec2</i>                                  | pSEVA2514 derivative bearing the <i>rec2</i> recombinase; <i>oriV</i> (RFS1010); cargo [cl857-P <sub>L</sub> $\rightarrow$ <i>rec2</i> ]; Km <sup>R</sup>                                                                                                                                                    | This work                              |

|                                                                    |                                                                                                                                                                                                                                                |                                 |
|--------------------------------------------------------------------|------------------------------------------------------------------------------------------------------------------------------------------------------------------------------------------------------------------------------------------------|---------------------------------|
| pSEVA2514- <i>rec2</i> - <i>mutL</i> <sub>E36K</sub> <sup>PP</sup> | pSEVA2514 derivative bearing the <i>rec2</i> recombinase and <i>mutL</i> <sub>E36K</sub> <sup>PP</sup> allele; <i>oriV</i> (RFS1010); cargo [cl857-P <sub>L</sub> → <i>rec2</i> - <i>mutL</i> <sub>E36K</sub> <sup>PP</sup> ]; Km <sup>R</sup> | This work                       |
| pSEVA231-CRISPR                                                    | pSEVA231 derivative bearing the CRISPR array; <i>oriV</i> (pBBR1); Km <sup>R</sup>                                                                                                                                                             | (Aparicio <i>et al.</i> , 2018) |
| pSEVA231-C- <i>mutS1</i>                                           | pSEVA231 derivative bearing the CRISPR array with a <i>mutS</i> spacer; <i>oriV</i> (pBBR1); Km <sup>R</sup>                                                                                                                                   | This work                       |
| pSEVA421-Cas9tr                                                    | pSEVA421 derivative bearing the <i>cas9</i> gene and <i>tracrRNA</i> ; <i>oriV</i> (RK2); Sm <sup>R</sup> /Sp <sup>R</sup>                                                                                                                     | (Aparicio <i>et al.</i> , 2018) |
| pSEVA658- <i>ssr</i>                                               | pSEVA658 derivative bearing the <i>ssr</i> recombinase; <i>oriV</i> (RSF1010); cargo [ <i>xylS</i> -P <sub>m</sub> → <i>ssr</i> ]; Gm <sup>R</sup>                                                                                             | (Aparicio <i>et al.</i> , 2018) |
| pRK600                                                             | Helper plasmid used for conjugation; <i>oriV</i> (ColE1), RK2 (mob+ tra+); Cm <sup>R</sup>                                                                                                                                                     | (Kessler <i>et al.</i> , 1992)  |

---

1

2 <sup>a</sup> Antibiotic markers: Km, kanamycin; Rif, rifampicin; Sm, streptomycin; Sp, spectinomycin; Cm, chloramphenicol;  
3 Gm, gentamicin

4

5



FIGURES

Figure 1. Plasmids used in this study

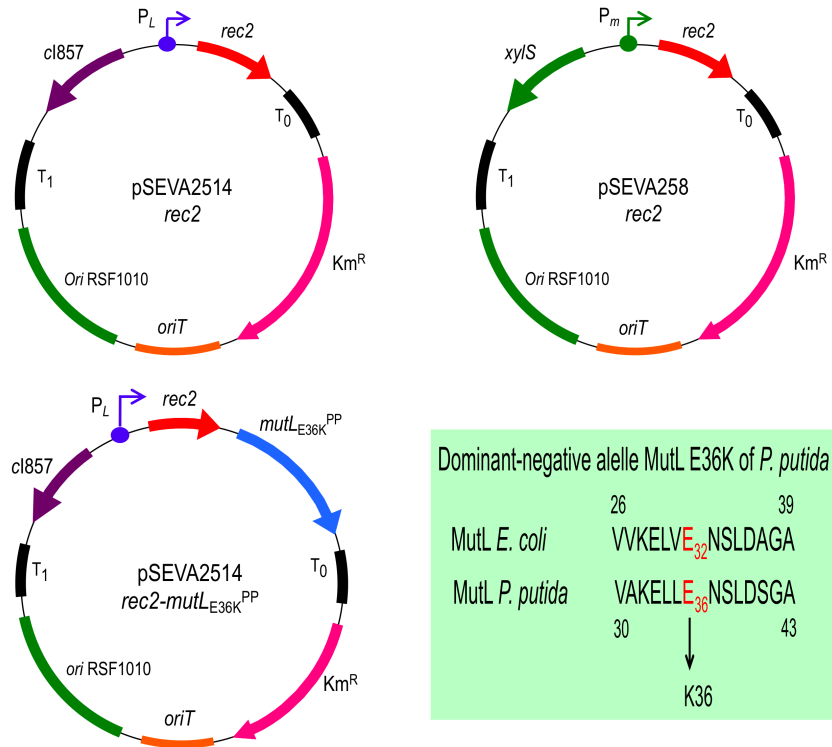

Structure of plasmids promoting recombinering are shown(T<sub>0</sub> and T<sub>1</sub>, transcriptional terminators; Km, Kanamycin resistance gene; *oriT*, origin of transfer; *ori* RSF1010, origin of replication; *cl857*-P<sub>L</sub>, temperature inducible expression system; *xyIS*-P<sub>m</sub>, expression system inducible by 3-MB; *rec2*, recombinase; *mutL*<sub>E36K</sub><sup>PP</sup>, dominant-negative allele of *mutL*). A conserved amino acid stretch of *E. coli* and *P. putida* KT2440 MutL proteins is also shown. The change E→K, responsible of the dominant-negative phenotype over MMR system, is highlighted in red (see Supplementary Fig. S1 for complete alignment). Pictures are not drawn to scale. pSEVA2514-*rec2* map derives from (Ricaurte *et al.*, 2018).

1 **Figure 2.** The impairment of MMR system of *P. putida* allows unbiased detection/repair of two  
 2 mismatches with MMR differential sensitivity.

3

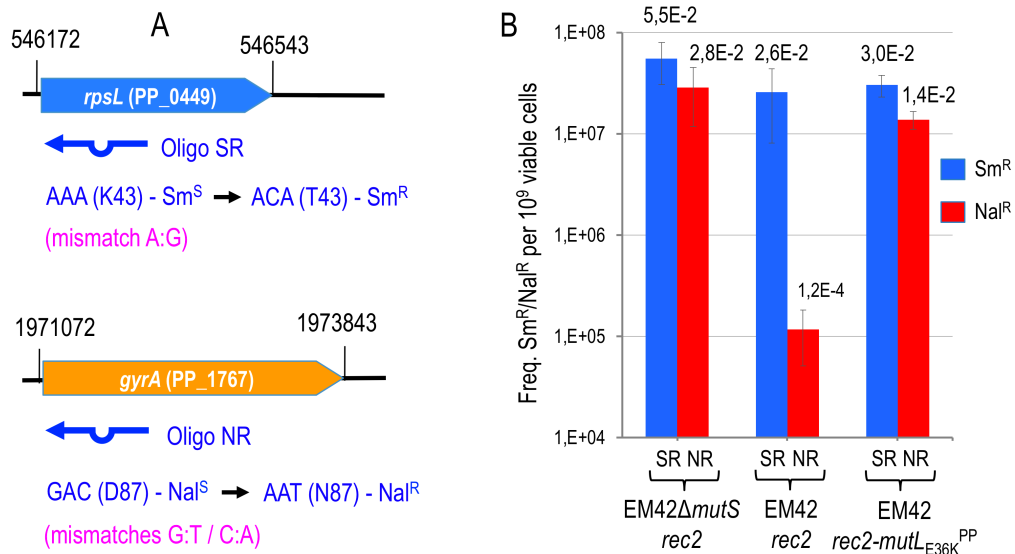

4

5

6 **A.** Reporter genes used to assess MMR system activity in *P. putida* EM42 are outlined. Chromosomal  
 7 coordinates and locus tag are shown. Recombineering oligonucleotides are sketched below each gene,  
 8 featuring the mutation introduced, the mismatch between chromosomal and synthetic sequences and  
 9 also the resulting phenotype. **B.** Oligos SR (A:G mismatch, low MMR sensitivity, confers Sm<sup>R</sup>) and NR  
 10 (G:T and C:A mismatches, high MMR sensitivity, confer Nal<sup>R</sup>) were used for recombineering in *P. putida*  
 11 strains Δ*mutS*/pSEVA2514-*rec2*, EM42/pSEVA2514-*rec2* and EM42/pSEVA2514-*rec2-mutL*<sub>E36K</sub><sup>PP</sup>.  
 12 Cultures of each strain were subjected to recombineering with SR and NR oligonucleotides separately  
 13 as explained in Experimental Procedures section. Dilutions of each experiment were plated on LB and  
 14 LB-Sm (oligo SR) or LB-Nal (oligo NR) and colonies counted after 18 h at 30 °C. Column values  
 15 represent mean recombineering frequencies (mutants per 10<sup>9</sup> viable cells) of two independent  
 16 experiments with the standard deviation. Absolute frequencies (mutants per viable cell) are also shown  
 17 above each column.

18

19

1 **Figure 3. Hierarchy of *P. putida* MMR system**

2

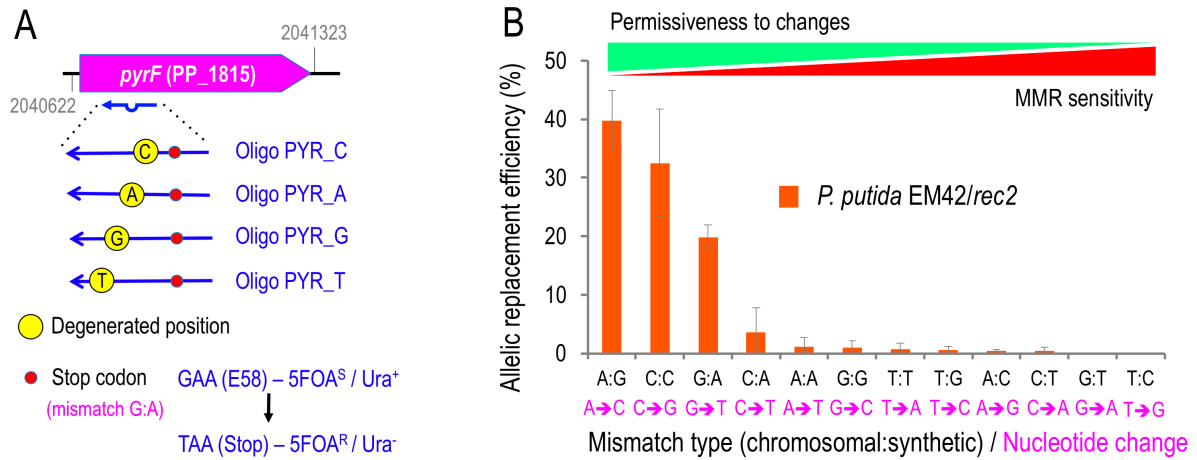

3

4

5 **A.** The *pyrF* reporter gene used to assess MMR hierarchy in *P. putida* EM42 is outlined. Locus tag and  
 6 chromosomal coordinates are shown. The four PYR\_X oligos introduce the same Stop codon (red dot),  
 7 thus rendering a *pyrF* strain which is uracil auxotroph and 5FOA resistant, but bear a different  
 8 degenerated position each (yellow dot, the genomic nucleotide that pairs with oligonucleotide  
 9 is depicted inside), generating three mismatches per oligonucleotide. Pictures are not drawn to scale **B.**  
 10 *P. putida* EM42/pSEVA2514-*rec2* (WT strain- wild-type MMR system) was subjected to recombineering  
 11 with an equimolar mixture of oligos PYR\_C, PYR\_A, PYR\_G and PYR\_T. After selection of minimal  
 12 media plus Ura/5FOA, 500 *pyrF* colonies were streaked in the same media and the streaks re-  
 13 suspended in water, then pelleted and the whole genomic content extracted. *pyrF* gene was PCR  
 14 amplified from the gDNA and sequenced by Illumina deep sequencing. Sequences were analysed to  
 15 verify the presence of single mutations on the four degenerated positions targeted by PYR  
 16 oligonucleotides. The relative frequencies of incorporated mutations were plotted and labelled with the  
 17 original mismatch and the base change originated. The values are the mean of two independent  
 18 experiments, bars representing standard deviations

19

20

1 **Figure 4.** Effect of MMR inactivation on mismatch repair bias.

2

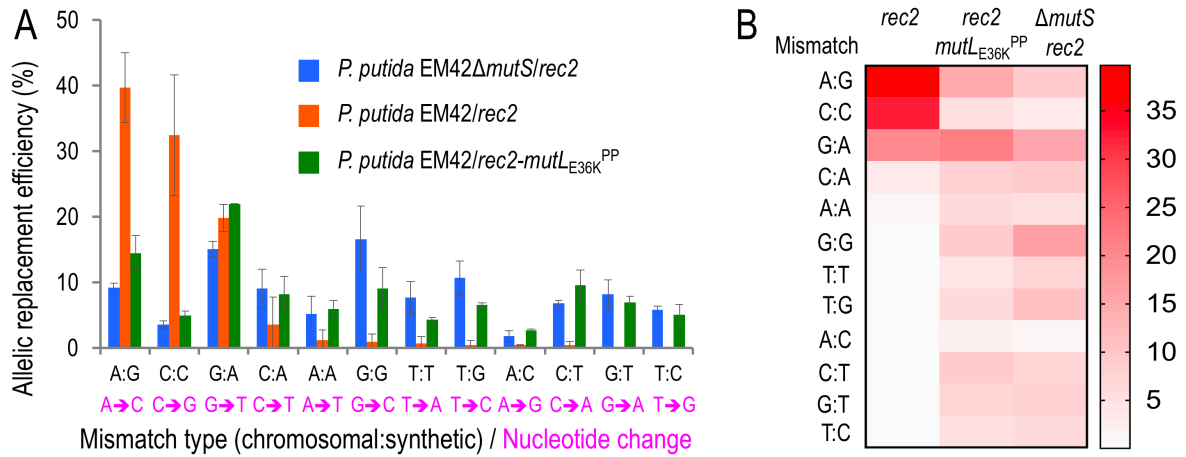

3

4

5 **A.** The same experiment as shown in Fig. 3 was performed using EM42Δ*mutS*/pSEVA2514-*rec2*  
6 (Δ*mutS* strain with an inactive MMR system) and EM42/pSEVA2514-*rec2*-*mutL*<sub>E36K</sub><sup>PP</sup> (MMR system  
7 transiently inhibited) strains and the results were compared with the wild-type scenario to study  
8 differences in the mutation bias under constitutive or transient impairment of MMR system, respectively.

9 **B.** Heatmap of allelic replacement frequencies of the three strains under study. Detailed information of  
10 allelic replacement frequencies of every mismatch is shown in Supplementary Fig. S3.

11

1 **Figure 5.** Mutation rates of *P. putida* EM42-derived strains.

2

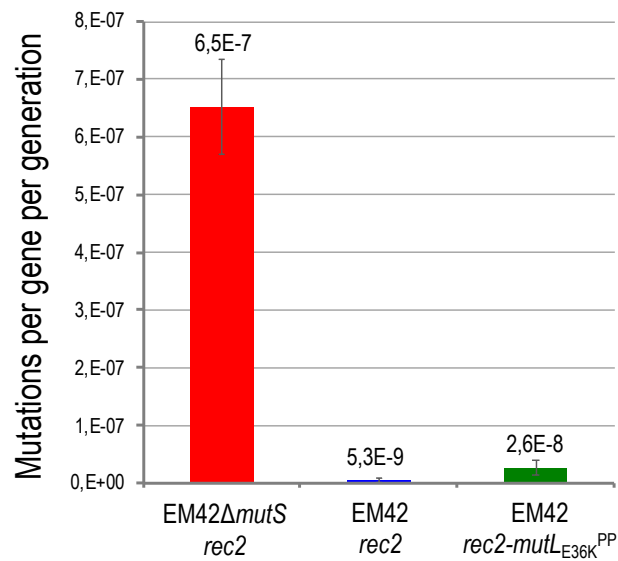

3

4

5 A rifampicin resistance fluctuation assay was used to estimate the mutation rates of  
6 EM42 $\Delta$ *mutS*/pSEVA2514-*rec2*, EM42/pSEVA2514-*rec2* and EM42/pSEVA2514-*rec2-mut*<sub>L<sub>E36K</sub></sub><sup>PP</sup> as  
7 described in Experimental Procedures. Fifteen independent replicas were performed and results  
8 analyzed with the FALCOR web tool by the MMS-Maximum Likelihood Estimator Method. FALCOR  
9 averages estimating mutations per gen per generation are depicted above the columns. Error bars  
10 account for the 95% Confidence Intervals difference.

11

12

13
